# Supplementary material
Source: PubMed Central journal article supplement (PMC2799869)
Supplement: 0910935106_0910935106SI.pdf [file 0910935106_0910935106SI.pdf]

# Supporting Information

Yasuhara et al. 10.1073/pnas.0910935106

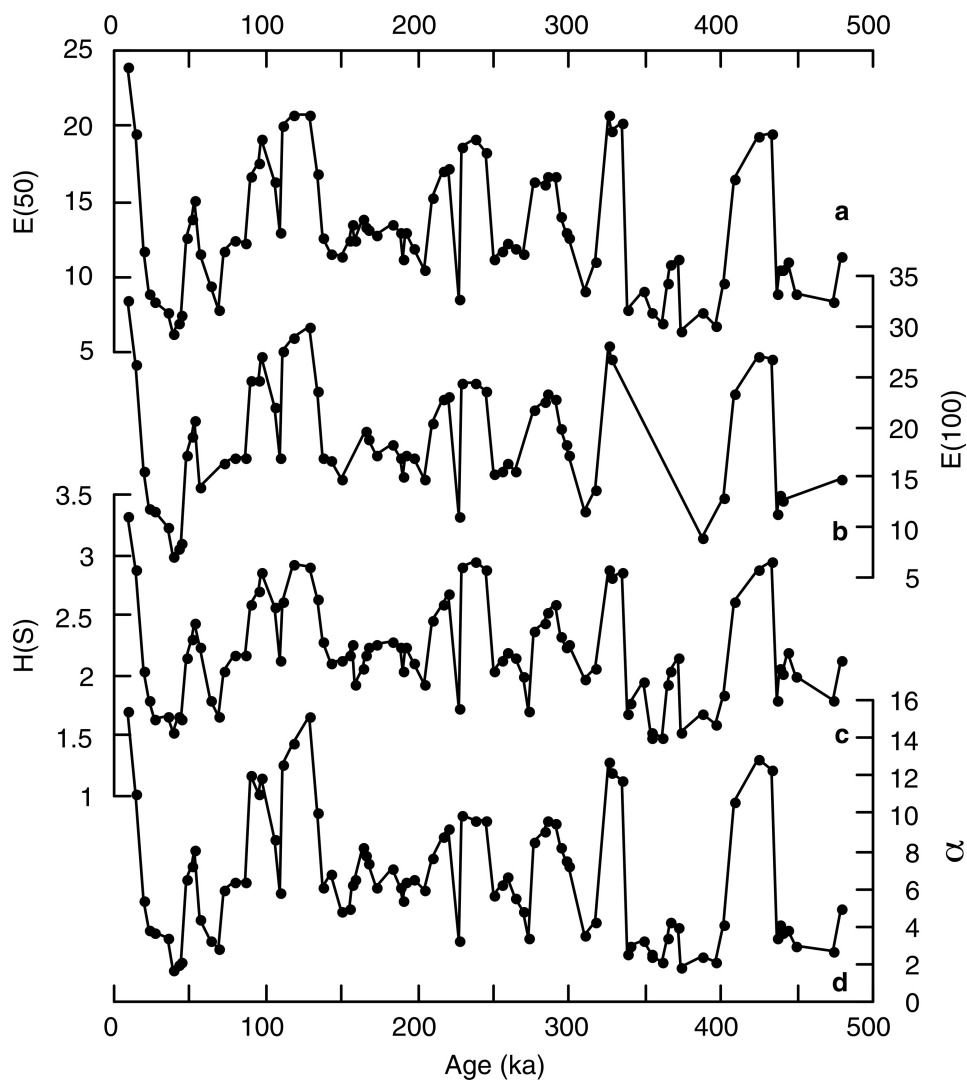

Fig. S1. Ostracod species diversity represented as E(50) (A), E(100) (B), Shannon index [H(S)] (C), and Fisher's alpha ( $\alpha$ ) (D).

**Table S1. Modern coretop (=Holocene) and Last Glacial Maximum (LGM:  $\approx 20$  ka) species diversity E(50) of North Atlantic and Arctic deep-sea sites (>1,000 m water depth)**

| Site                     | ODP 925    | ODP 1055 | Chain 82–24 | ODP 980    | ODP 982    | PS 1243 | PS 2163–1 | PS 2170–4 |
|--------------------------|------------|----------|-------------|------------|------------|---------|-----------|-----------|
| Modern E(50)             | 24.7       | 16.7     | 12.6        | 12.9       | 8.8        | 4.7     | 4.2       | 4.0       |
| No. samples lumped       | 1          | 6        | 2           | 1          | 1          | 6       | 1         | 1         |
| Modern slope spp. E(50)  | 19.4       | 9.3      | 8.8         | 12.3       | 8.6        | 2.0     | 3.8       | 3.0       |
| No. samples lumped       | 1          | 9        | 9           | 4          | 3          | 25      | 1         | 2         |
| LGM E(50)                | 7.3        | 15.2     | 9.0         | 12.3       | 16.8       | 6.4     | NA        | 4.0       |
| No. samples lumped       | 2          | 1        | 2           | 1          | 1          | 1       | NA        | 2         |
| Latitude ( $^{\circ}$ N) | 4.2        | 32.8     | 41.7        | 55.5       | 57.5       | 69.4    | 86.2      | 87.6      |
| Water depth (m)          | 3,040      | 1,798    | 3,427       | 2,179      | 1,145      | 2,715   | 3,040     | 4,083     |
| References               | This study | 1        | 2           | This study | This study | 3       | 4         | 4         |

1. Yasuhara M, Cronin TM, deMenocal PB, Okahashi H, Linsley BK (2008) Abrupt climate change and collapse of deep-sea ecosystems. *Proc Natl Acad Sci USA* 105:1556–1560.
2. Cronin TM, DeMartino DM, Dwyer GS, Rodriguez-Lazaro J (1999) Deep-sea ostracode species diversity: Response to late Quaternary climate change. *Mar Micropaleontol* 37:231–249.
3. Cronin TM, Boomer I, Dwyer GS, Rodriguez-Lazaro J (2002) in *The Ostracoda: Applications in Quaternary Research*, eds Holmes JA, Chivas AR (American Geophysical Union, Washington, DC), pp 99–119.
4. Cronin TM, et al. (1995) Late Quaternary paleoceanography of the Eurasian Basin, Arctic Ocean. *Paleoceanography* 10:259–281.
